# Supplementary material for: Two cationic [(CuxIy)x−y]n motif based coordination polymers and their photocatalytic properties
Source: Royal Society of Chemistry journal article supplement (doi:10.1039/c6ra10627g), 2016-01-01
Supplement: c6ra10627g1.pdf [file c6ra10627g1.pdf]

## Two Cationic $[(\text{Cu}_x\text{I}_y)^{x-y}]_n$ Motifs Based Coordination

### Polymers and Their Photocatalytic Properties

Hao-Ran Yan<sup>a</sup>, Jian Wang<sup>b</sup>, Ying-Hui Yu<sup>a</sup>, Guang-Feng Hou<sup>a,c,\*</sup>, Hong-Xing Zhang<sup>b</sup>  
and Jin-Sheng Gao<sup>a,c</sup>

<sup>a</sup> School of Chemistry and Materials Science, Heilongjiang University, Harbin 150080, China; <sup>b</sup> International Joint Research Laboratory of Nano-Micro Architecture Chemistry, Institute of Theoretical Chemistry, Jilin University, Changchun 130023, P. R. China; <sup>c</sup> Engineering Research Centre of Pesticide, Heilongjiang University, Harbin 150080, China.

Figures

**Fig. S1.** PXRD comparison of calculated, experimented patterns (before and after successive catalysis for 5 times) of CPs **1** and **2**.

**Fig. S2.** Variable-temperature XRD of CPs **1** and **2**.

**Fig. S3.** TGA curves of CPs **1** and **2**.

**Fig. S4.** UV-vis spectra of CPs **1** and **2** in the solid state.

**Fig. S5.** Luminescent spectra of HTBA, CP **1**, CP **1** at -200 °C and **1a** (CP **1** after treated at 200 °C for 3 h).

**Fig. S6.** Lifetime of CP **1**.

**Fig. S7.** The simulated excitation spectrum of **1**, TD-M062X/LanL2DZ; 6-31+G(d) level of theory.

**Fig. S8.** TGA curve of HTBA.

**Fig. S9.** IR spectra of HTBA, CPs **1** and **2**.

Tables

**Table S1.** Selected Bond Lengths (Å) and Bond Angles (°) for CPs 1 and 2.

**Table S2.** Hydrogen Bonds for CP 2.

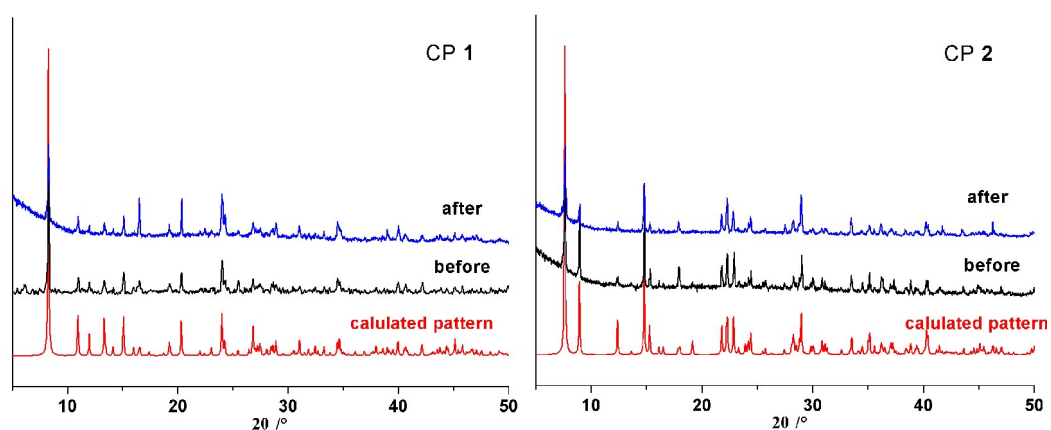

**Fig. S1.** PXRD comparison of calculated, experimented patterns (before and after successive catalysis for 5 times) of CPs 1 and 2.

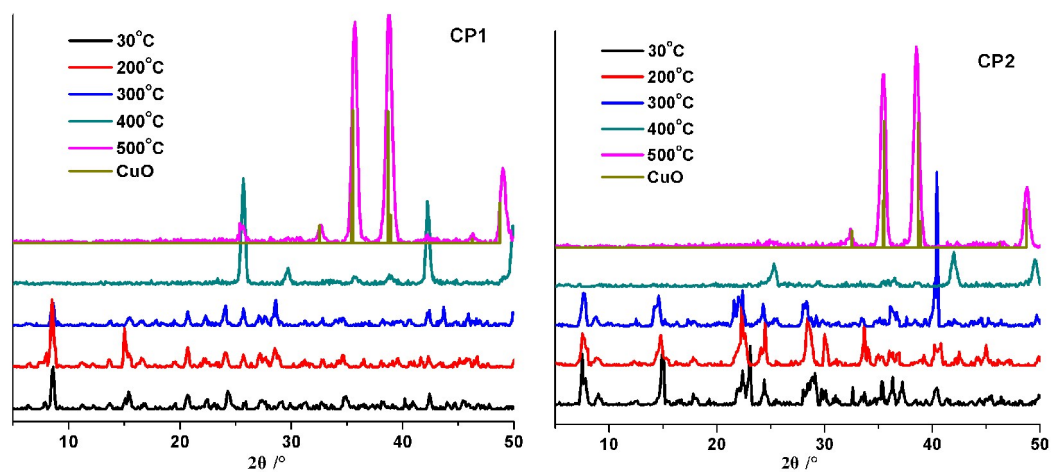

**Fig. S2.** Variable-temperature XRD of CPs 1 and 2.

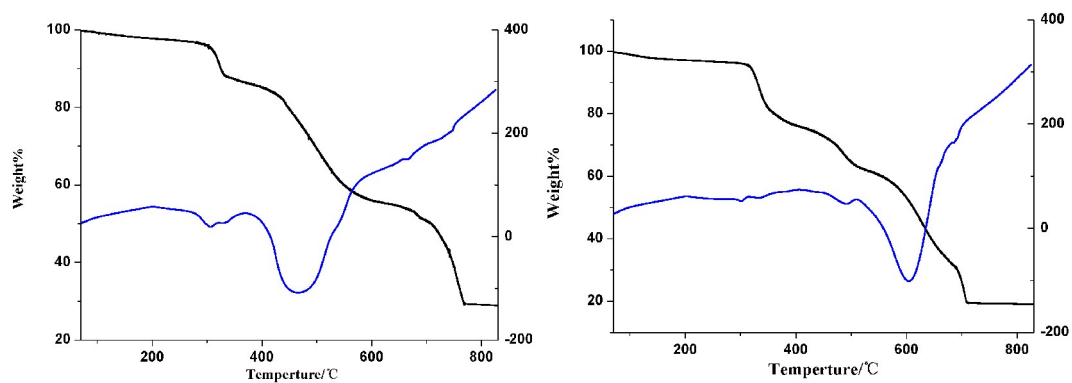

**Fig. S3.** TGA curves of CPs **1** (left) and **2** (right).

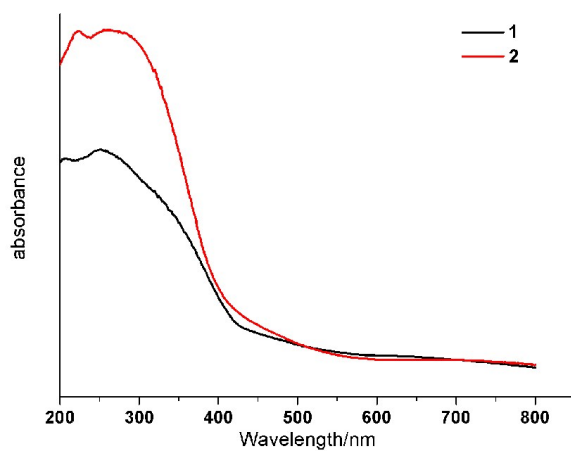

**Fig. S4.** UV-vis spectra of CPs **1** and **2** in the solid state.

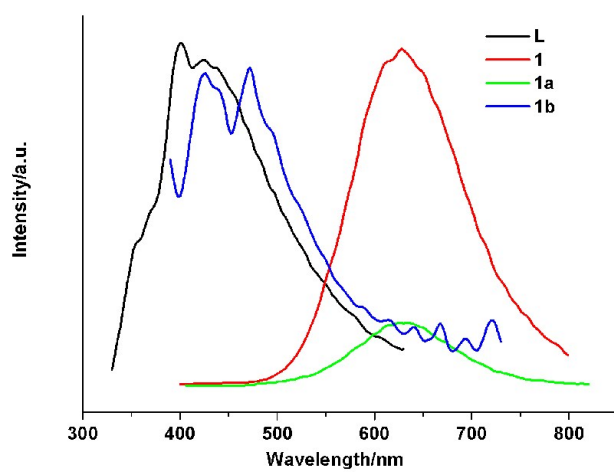

**Fig. S5.** Luminescent spectra of HTBA, CP **1**, CP **1** at  $-200\text{ }^{\circ}\text{C}$  and **1a** (CP **1** after treated at  $200\text{ }^{\circ}\text{C}$  for 3 h).

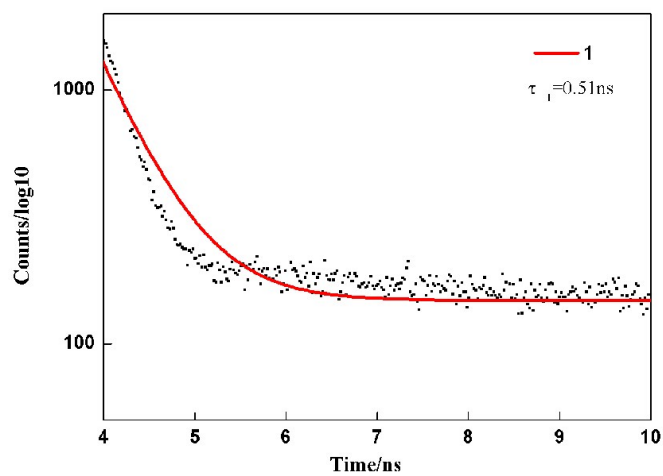

**Fig. S6.** Lifetime of CP 1.

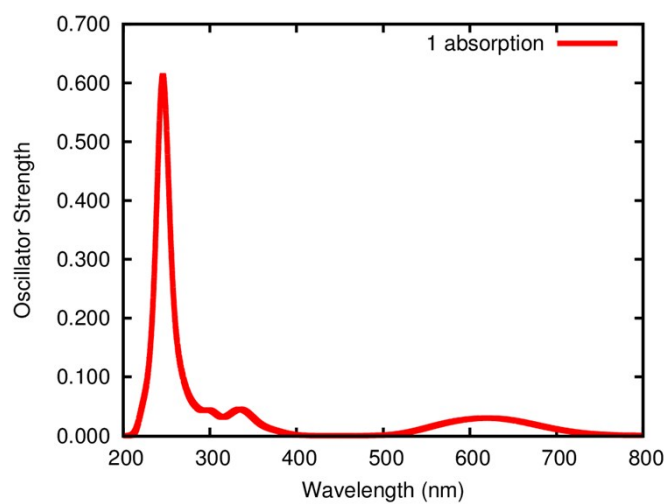

**Fig. S7.** The simulated excitation spectrum of **1**, TD-M062X/LanL2DZ; 6-31+G(d) level of theory.

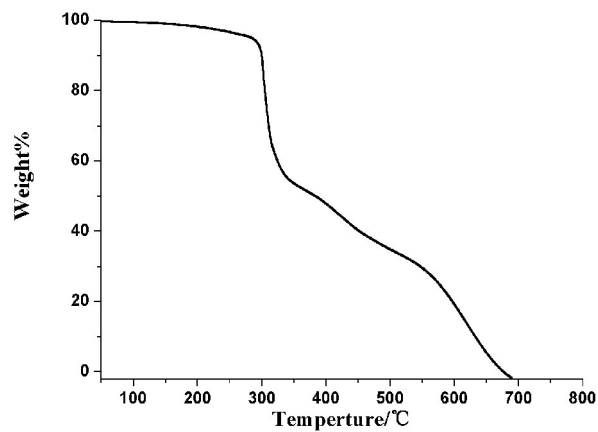

**Fig. S8.** TGA curve of HTBA.

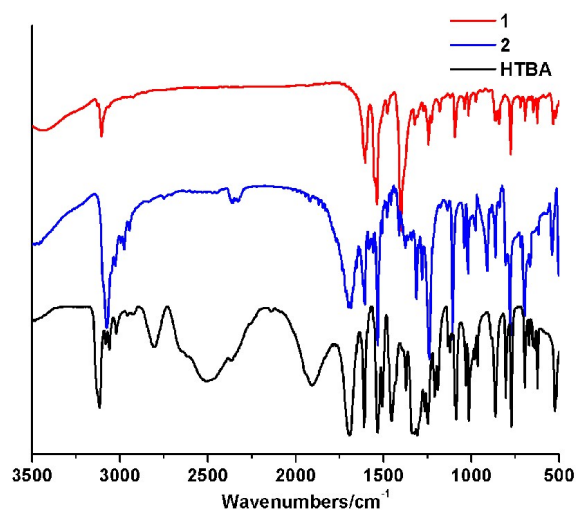

**Fig. S9.** IR spectra of HTBA, CPs 1 and 2.

**Table S1.** Selected Bond Lengths (Å) and Bond Angles (°) for CPs 1 and 2.

| CP 1                     |          |            |            |
|--------------------------|----------|------------|------------|
| Bond                     | Dist.    | Bond       | Dist.      |
| Cu(1)–N(2) <sup>I</sup>  | 2.000(5) | Cu(2)–I(2) | 2.6731(10) |
| Cu(1)–N(3) <sup>II</sup> | 2.015(4) | Cu(2)–I(1) | 2.7358(11) |

|                                               |            |                                 |            |
|-----------------------------------------------|------------|---------------------------------|------------|
| Cu(1)–I(2)                                    | 2.6142(9)  | Cu(2)–I(1) <sup>III</sup>       | 2.7798(12) |
| Cu(1)–I(1) <sup>III</sup>                     | 2.7264(10) | Cu(3)–O(1) <sup>III</sup>       | 1.933(4)   |
| Cu(2)–O(2)                                    | 1.985(4)   | Cu(3)–I(2)                      | 2.5376(10) |
| Cu(2)–Cu(3)                                   | 2.4666(12) | Cu(3)–I(1)                      | 2.8191(11) |
| Angle                                         | (°)        | Angle                           | (°)        |
| N(2) <sup>I</sup> –Cu(1)–N(3) <sup>II</sup>   | 115.67(18) | I(2)–Cu(2)–I(1)                 | 99.61(3)   |
| N(2) <sup>I</sup> –Cu(1)–I(2)                 | 119.50(15) | O(2)–Cu(2)–I(1) <sup>III</sup>  | 107.36(14) |
| N(3) <sup>II</sup> –Cu(1)–I(2)                | 103.76(14) | I(2)–Cu(2)–I(1) <sup>III</sup>  | 107.87(4)  |
| N(2) <sup>I</sup> –Cu(1)–I(1) <sup>III</sup>  | 100.88(15) | I(1)–Cu(2)–I(1) <sup>III</sup>  | 107.55(4)  |
| N(3) <sup>II</sup> –Cu(1)–I(1) <sup>III</sup> | 105.07(14) | O(1) <sup>III</sup> –Cu(3)–I(2) | 134.54(14) |
| I(2)–Cu(1)–I(1) <sup>III</sup>                | 111.25(3)  | O(1) <sup>III</sup> –Cu(3)–I(1) | 113.32(13) |
| O(2)–Cu(2)–I(2)                               | 115.91(14) | I(2)–Cu(3)–I(1)                 | 100.82(4)  |
| O(2)–Cu(2)–I(1)                               | 117.90(14) |                                 |            |

Symmetry codes: I: x+1,-y+3/2,z-1/2; II: -x,y-1/2,-z+3/2; III: -x+1, -y+2, -z+1

### CP 2

| Bond                                       | Dist.      | Bond                          | Dist.     |
|--------------------------------------------|------------|-------------------------------|-----------|
| Cu(1)–N(3) <sup>I</sup>                    | 1.974(3)   | Cu(1)–I(1) <sup>I</sup>       | 2.7375(5) |
| Cu(1)–N(2)                                 | 1.983(3)   | Cu(1)–I(1)                    | 2.7563(5) |
| Angle                                      | (°)        | Angle                         | (°)       |
| N(3) <sup>I</sup> –Cu(1)–N(2)              | 140.90(13) | N(2)–Cu(1)–I(1)               | 100.90(9) |
| N(3) <sup>I</sup> –Cu(1)–I(1) <sup>I</sup> | 101.12(9)  | I(1) <sup>I</sup> –Cu(1)–I(1) | 112.60(2) |
| N(2)–Cu(1)–I(1) <sup>I</sup>               | 101.23(9)  | C(2)–N(2)–Cu(1)               | 126.6(2)  |
| N(3) <sup>I</sup> –Cu(1)–I(1)              | 99.53(9)   | N(3)–N(2)–Cu(1)               | 124.0(2)  |

Symmetry codes: I: x,-y+1,z-1/2

**Table S2.** Hydrogen Bonds for CP 2

| D–H...A                         | d(D–H) | d(H...A) | d(D...A)  |
|---------------------------------|--------|----------|-----------|
| O(2)–H(2A)···O(2) <sup>#5</sup> | 0.82   | 1.70     | 2.473(5)  |
| O(3)–H(31)···O(1) <sup>#6</sup> | 0.85   | 2.30     | 2.962(11) |
| O(3)–H(32)···O(1) <sup>#7</sup> | 0.85   | 2.09     | 2.844(12) |

Symmetry codes: 5: -x+1/2,-y-1/2,-z; 6: x,-y,z+1/2; 7: -x+1,-y,-z+1
